# Supplementary material
Source: PubMed Central journal article supplement (PMC3188841)
Supplement: mmc1.pdf [file mmc1.pdf]

**The American Journal of Human Genetics, Volume 89  
Supplemental Data**

## **Denisova Admixture and the First Modern Human**

### **Dispersals into Southeast Asia and Oceania**

**David Reich, Nick Patterson, Martin Kircher, Frederick Delfin, Madhusudan R. Nandineni, Irina Pugach, Albert Min-Shan Ko, Ying-Chin Ko, Timothy A. Jinam, Maude E. Phipps, Naruya Saitou, Andreas Wollstein, Manfred Kayser, Svante Pääbo, and Mark Stoneking**

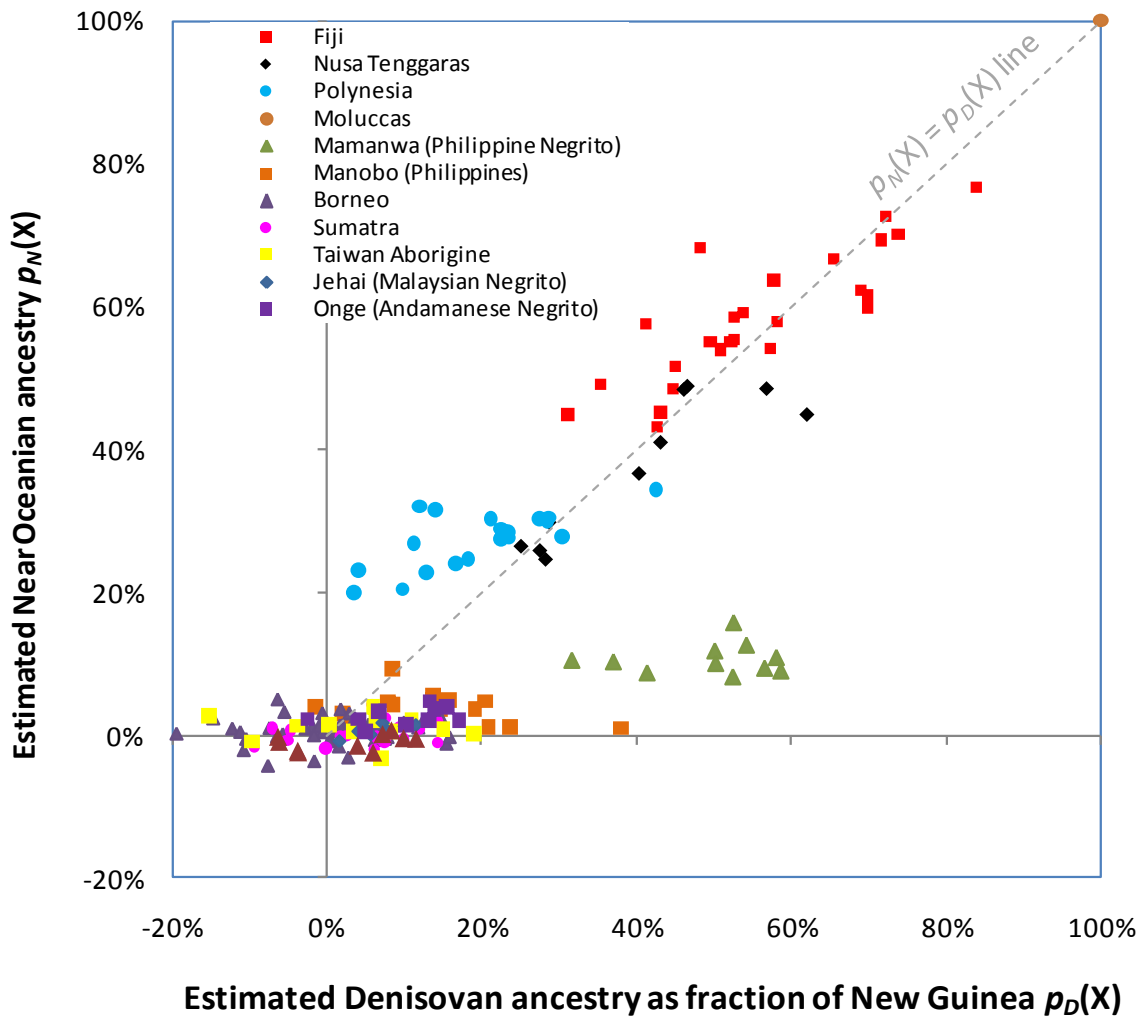

### Figure S1. Estimates of Denisovan and Near Oceanian Admixture by Individual

The x-axis plots  $p_D(X)$ , the estimate of Denisova mixture proportion in a sample as a fraction of that in New Guinea, and the y-axis plots  $p_N(X)$ , the estimate of Near Oceanian admixture. This plot presents the same information as Figure 2, but by individual rather than by population. As in Figure 2, the Mamanwa (Philippine Negritos) stand out relative to the  $p_D(X) = p_N(X)$  line, reflecting Denisova genetic material in the Mamanwa that cannot be explained by Near Oceanian gene flow.

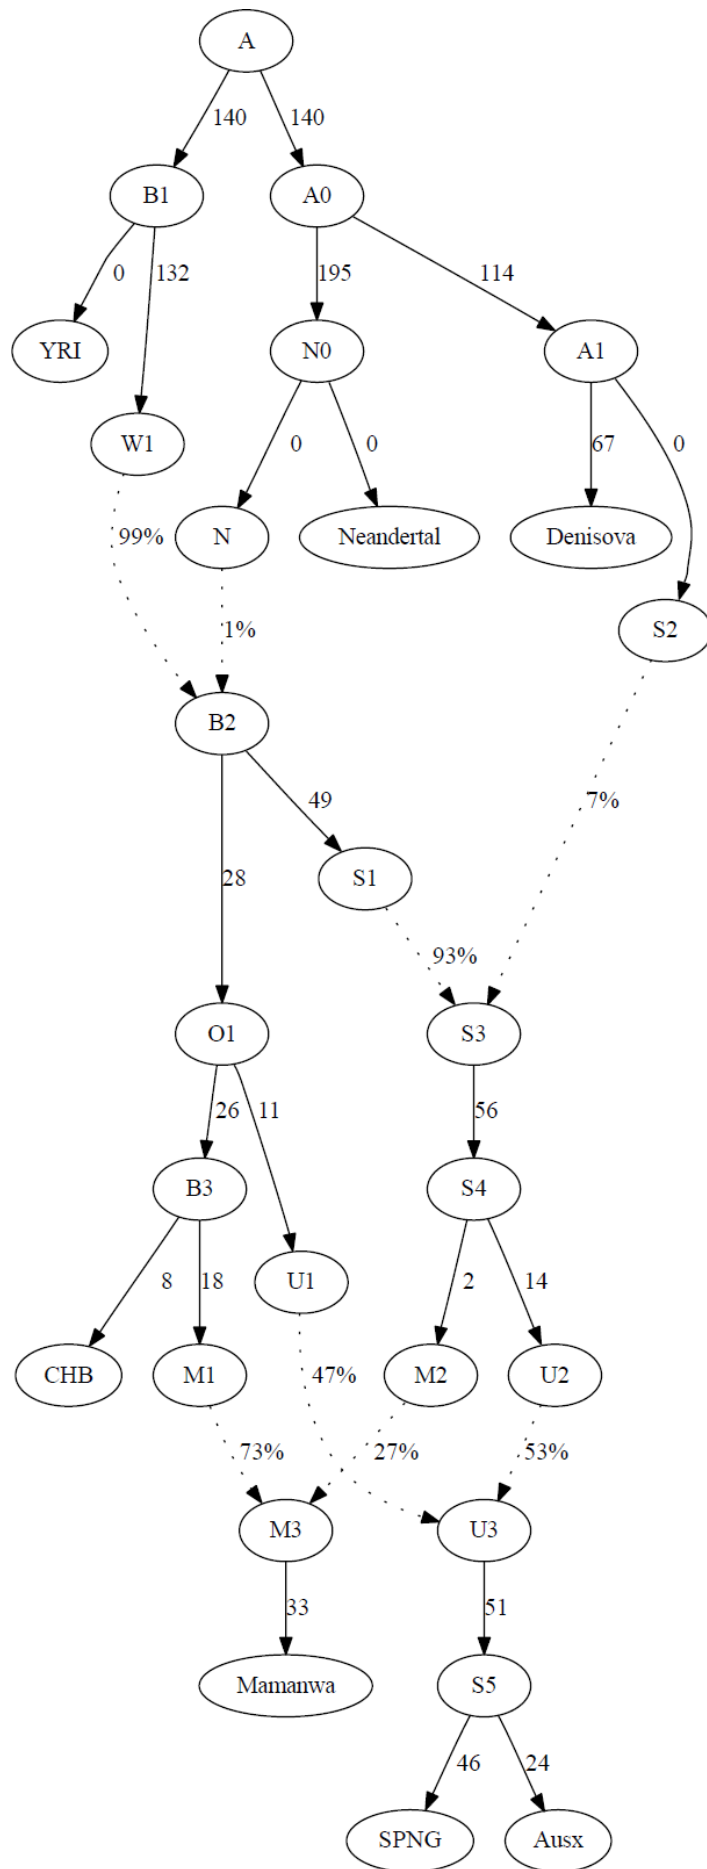

**Figure S2. An Admixture Graph that Fits the Data for 7 Populations**  
 We show the estimated genetic drift on each branch (as fractions of 1000), along with the best fit mixture proportions. Labels on internal nodes (e.g., B1, B2, S1, A0, U1) correspond to hypothetical ancestral populations.

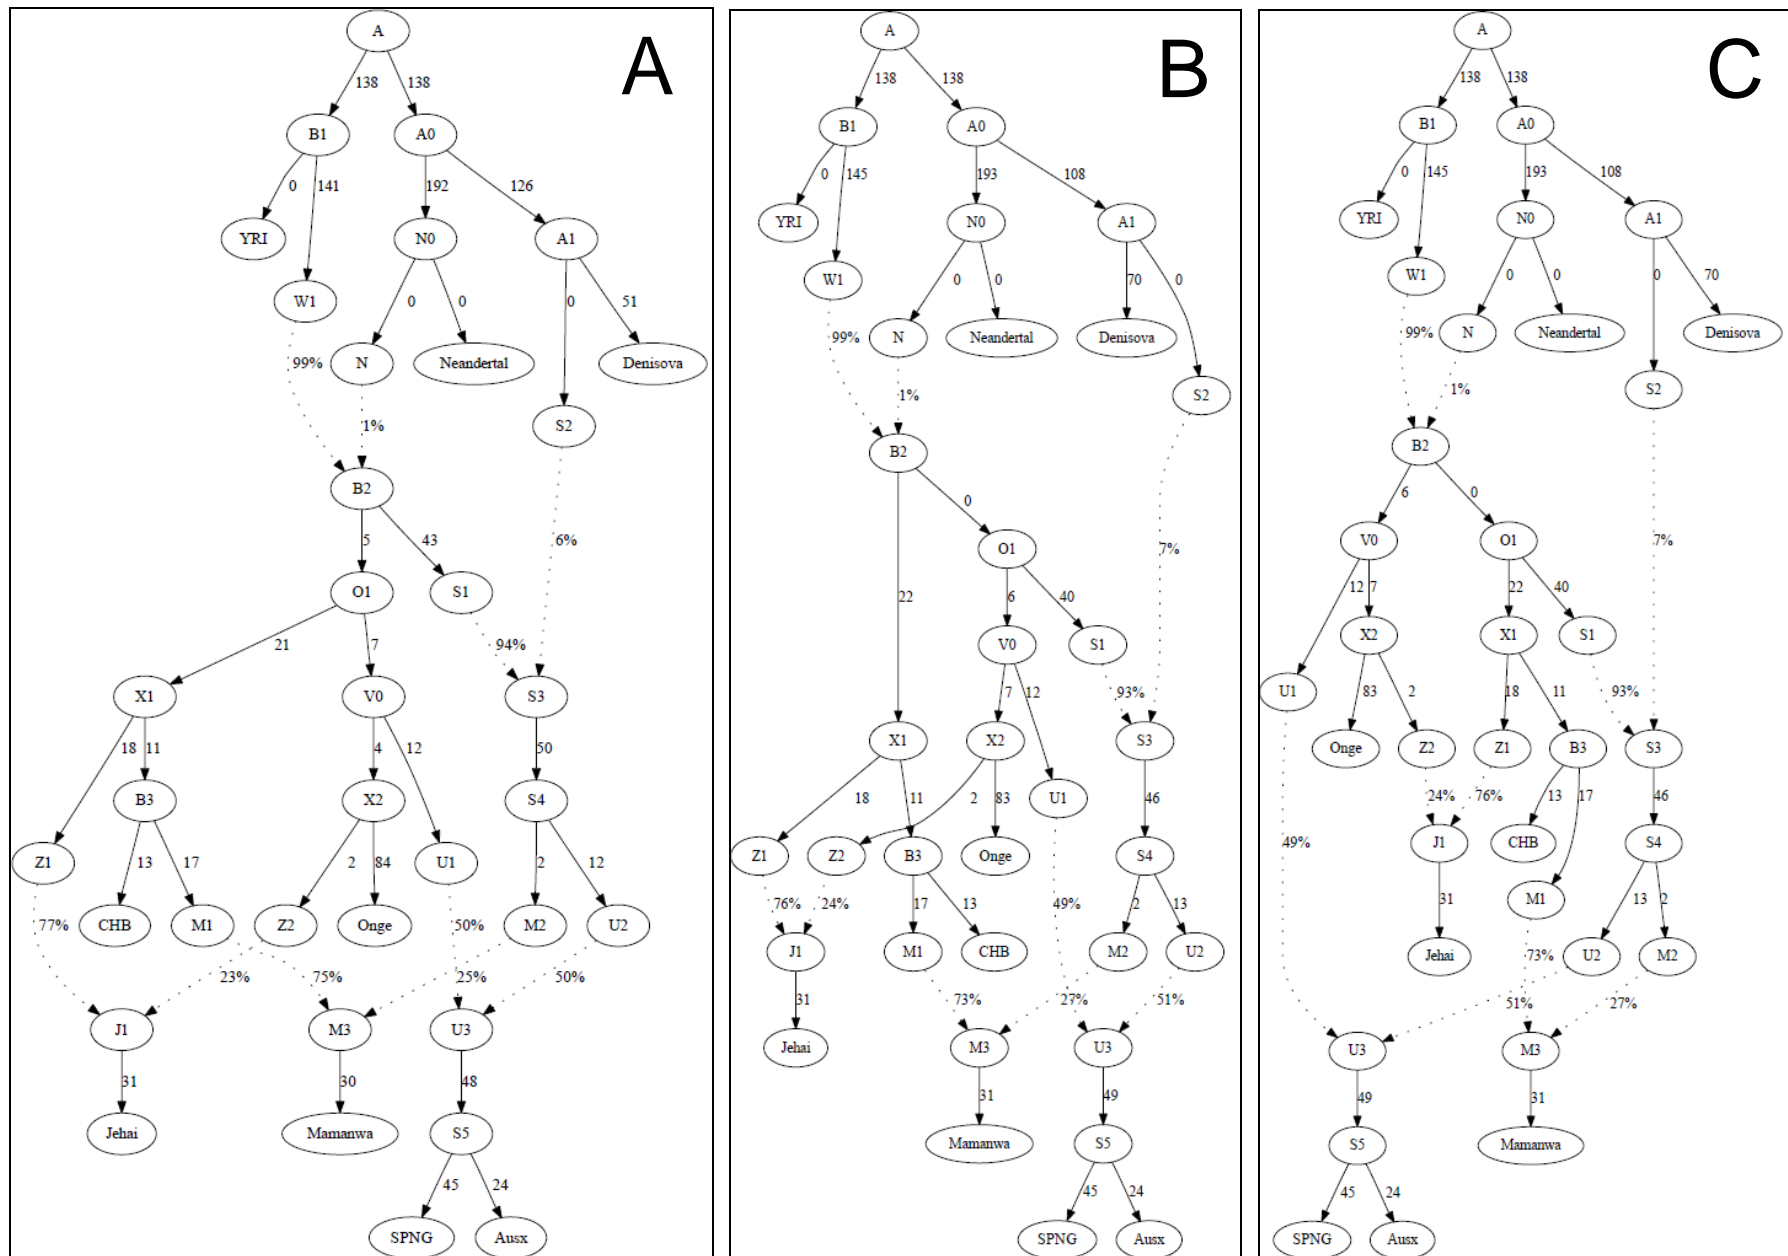

**Figure S3. Three Admixture Graphs that Are Equally Good Fits to the Data for 9 Populations**

We show the estimated genetic drift on each branch (as fractions of 1000), along with the best fit mixture proportions. Labels on internal nodes correspond to hypothetical ancestral populations. (A) Australians, New Guineans, and Mamanwa are outgroups to other non-Africans; (B) Chinese are an outgroup; (C) Onge and Jehai are outgroups. We cannot distinguish these 3 scenarios statistically, so represent them as a trifurcation in Figure 3.

**Table S1. Summary Statistics for DNA Sequence Data Newly Collected for This Study**

|                                          | New Guinea Highlander (SH10) |                                 | Mamanwa (ID36)               |                                 |
|------------------------------------------|------------------------------|---------------------------------|------------------------------|---------------------------------|
|                                          | Map to human ( <i>hg18</i> ) | Map to chimp ( <i>pantro2</i> ) | Map to human ( <i>hg18</i> ) | Map to chimp ( <i>pantro2</i> ) |
| <b>Raw clusters</b>                      | 63,032,951                   | 63,032,951                      | 25,388,386                   | 25,388,386                      |
| <b>Aligned reads (Post filtering)</b>    | 80,946,976                   | 67,803,202                      | 32,497,235                   | 29,612,798                      |
| <b>Properly paired reads</b>             | 72,902,096                   | 60,863,602                      | 31,300,134                   | 28,532,254                      |
| <b>Fraction aligned (Post filtering)</b> | 64.21%                       | 53.78%                          | 64.00%                       | 58.32%                          |
| <b>Gigabases (Gb) (Post filtering)</b>   | 8.44                         | 7.07                            | 3.35                         | 3.05                            |
| <b>Coverage (divide Gb by 2.8)</b>       | 3.01                         | 2.53                            | 1.20                         | 1.09                            |

**Table S2. Stability of Denisovan Admixture Estimate  $p_D(X)$**

|                              | A YRI      |              |                 | A San          |              |                 | A YRI          |              |                 | A YRI          |              |                 | A Chimp        |              |                 | A YRI          |              |                 |                |
|------------------------------|------------|--------------|-----------------|----------------|--------------|-----------------|----------------|--------------|-----------------|----------------|--------------|-----------------|----------------|--------------|-----------------|----------------|--------------|-----------------|----------------|
|                              | B Denisova |              |                 | B Denisova     |              |                 | B Neandertal   |              |                 | B Chimpanzee   |              |                 | B Denisova     |              |                 | B Denisova     |              |                 |                |
|                              | C CHB      |              |                 | C CHB          |              |                 | C CHB          |              |                 | C CHB          |              |                 | C CHB          |              |                 | C Borneo       |              |                 |                |
|                              | <b>N</b>   | <b>Ratio</b> | <b>Std.Err.</b> | <b>Z-score</b> |
| Australian 1                 | 8          | 103%         | 6%              | 16.6           | 101%         | 6%              | 15.8           | 108%         | 11%             | 9.6            | 103%         | 9%              | 11.0           | 104%         | 9%              | 12.0           | 103%         | 6%              | 16.4           |
| Australian 2                 | 2          | 103%         | 7%              | 14.1           | 98%          | 8%              | 12.9           | 94%          | 12%             | 7.5            | 103%         | 12%             | 8.6            | 105%         | 11%             | 9.6            | 103%         | 7%              | 13.9           |
| Fiji                         | 25         | 56%          | 3%              | 17.7           | 53%          | 3%              | 15.8           | 56%          | 5%              | 10.2           | 56%          | 5%              | 10.7           | 57%          | 5%              | 11.8           | 55%          | 3%              | 17.5           |
| Philippine Mamanwa (Negrito) | 11         | 49%          | 5%              | 9.2            | 48%          | 6%              | 8.5            | 53%          | 10%             | 5.2            | 56%          | 10%             | 5.8            | 41%          | 8%              | 5.2            | 49%          | 6%              | 8.8            |
| Nusa Tengarras               | 10         | 40%          | 3%              | 12.8           | 41%          | 3%              | 12.0           | 46%          | 6%              | 7.7            | 43%          | 5%              | 8.3            | 37%          | 5%              | 7.5            | 40%          | 3%              | 13.2           |
| Moluccas                     | 10         | 35%          | 4%              | 10.1           | 33%          | 4%              | 9.3            | 42%          | 6%              | 6.6            | 42%          | 6%              | 7.2            | 32%          | 5%              | 6.0            | 35%          | 3%              | 10.0           |
| Polynesia                    | 19         | 20%          | 4%              | 5.1            | 19%          | 4%              | 4.7            | 17%          | 7%              | 2.4            | 27%          | 6%              | 4.4            | 17%          | 6%              | 2.9            | 18%          | 4%              | 4.9            |
| Philippine Manobo            | 16         | 13%          | 3%              | 4.2            | 13%          | 3%              | 3.8            | 13%          | 6%              | 2.3            | 20%          | 5%              | 3.7            | 6%           | 5%              | 1.2            | 12%          | 3%              | 4.0            |
| Andamanese Onge (Negrito)    | 10         | 10%          | 6%              | 1.6            | -7%          | 7%              | -1.0           | 2%           | 12%             | 0.1            | 20%          | 11%             | 1.9            | 7%           | 10%             | 0.7            | 9%           | 6%              | 1.4            |
| Malaysian Jehai (Negrito)    | 8          | 7%           | 5%              | 1.4            | 9%           | 5%              | 1.7            | 16%          | 9%              | 1.8            | 15%          | 8%              | 1.8            | 4%           | 8%              | 0.5            | 6%           | 5%              | 1.2            |
| Sumatra                      | 17         | 4%           | 3%              | 1.4            | 2%           | 3%              | 0.8            | 9%           | 5%              | 1.6            | 11%          | 5%              | 2.3            | -3%          | 5%              | -0.7           | 3%           | 3%              | 1.1            |
| Taiwan Aborigine             | 12         | 4%           | 3%              | 1.2            | 2%           | 3%              | 0.5            | 12%          | 6%              | 2.0            | 12%          | 6%              | 2.2            | -3%          | 5%              | -0.5           | 3%           | 3%              | 0.8            |
| Malaysian                    | 10         | 3%           | 4%              | 0.8            | 2%           | 4%              | 0.6            | 1%           | 7%              | 0.2            | 8%           | 6%              | 1.3            | -1%          | 6%              | -0.3           | 2%           | 3%              | 0.5            |
| Borneo                       | 49         | 1%           | 2%              | 0.6            | 1%           | 3%              | 0.3            | 1%           | 5%              | 0.2            | 5%           | 4%              | 1.4            | -2%          | 4%              | -0.5           |              |                 |                |
| CHB (Chinese in Beijing)     | 88         |              |                 |                |              |                 |                |              |                 |                |              |                 |                |              |                 |                | -1%          | 3%              | -0.5           |
| CHD (Chinese in Denver)      | 86         | 0%           | 1%              | 0.0            | 0%           | 1%              | -0.3           | 0%           | 2%              | 0.2            | 2%           | 2%              | 0.9            | -2%          | 2%              | -0.8           | -1%          | 2%              | -0.6           |
| JPT (Japanese in Tokyo)      | 87         | -3%          | 2%              | -1.8           | -1%          | 2%              | -0.8           | -3%          | 3%              | -0.9           | -2%          | 3%              | -0.7           | -5%          | 3%              | -1.6           | -5%          | 3%              | -1.6           |

Note: The Denisova mixture proportion is expressed as a fraction of that in Papua New Guinea highlanders.

**Table S3. Stability of Near Oceanian  $p_N(X)$  and Australian  $p_A(X)$  Estimates**

|                                                                |    | A YRI<br>E CHB |          |         | A San<br>E CHB |          |         | A Chimpanzee<br>E CHB |          |         | A YRI<br>E Bornean |          |         |
|----------------------------------------------------------------|----|----------------|----------|---------|----------------|----------|---------|-----------------------|----------|---------|--------------------|----------|---------|
| Population                                                     | N  | Ratio          | Std.Err. | Z-score | Ratio          | Std.Err. | Z-score | Ratio                 | Std.Err. | Z-score | Ratio              | Std.Err. | Z-score |
| <b><math>p_N(X)</math> estimate of Near Oceanian admixture</b> |    |                |          |         |                |          |         |                       |          |         |                    |          |         |
| Fiji                                                           | 25 | 58%            | 0.6%     | 92.9    | 58%            | 0.6%     | 89.7    | 59%                   | 0.8%     | 73.0    | 58%                | 0.6%     | 92.6    |
| Philippine Mamanwa (Negrito)                                   | 11 | 11%            | 0.9%     | 11.4    | 10%            | 1.0%     | 9.8     | 7%                    | 1.2%     | 5.4     | 10%                | 0.9%     | 10.7    |
| Nusa Tenggara                                                  | 10 | 38%            | 0.7%     | 54.4    | 38%            | 0.7%     | 52.0    | 37%                   | 0.9%     | 43.1    | 37%                | 0.7%     | 55.7    |
| Moluccas                                                       | 10 | 34%            | 0.7%     | 45.3    | 33%            | 0.8%     | 42.4    | 33%                   | 0.9%     | 36.0    | 33%                | 0.7%     | 45.0    |
| Polynesia                                                      | 19 | 27%            | 0.8%     | 34.6    | 28%            | 0.8%     | 32.5    | 27%                   | 1.0%     | 27.0    | 27%                | 0.8%     | 34.5    |
| Philippine Manobo                                              | 16 | 4%             | 0.6%     | 5.7     | 3%             | 0.7%     | 5.2     | 2%                    | 0.8%     | 2.6     | 3%                 | 0.6%     | 5.0     |
| Andamanese Onge (Negrito)                                      | 10 | 3%             | 1.4%     | 1.8     | 0%             | 1.6%     | 0.0     | 1%                    | 1.8%     | 0.6     | 2%                 | 1.4%     | 1.4     |
| Malaysian Jehai (Negrito)                                      | 8  | 1%             | 1.1%     | 0.8     | 1%             | 1.1%     | 1.0     | 0%                    | 1.3%     | -0.3    | 0%                 | 1.0%     | 0.2     |
| Sumatra                                                        | 17 | 0%             | 0.6%     | 0.3     | 0%             | 0.6%     | -0.3    | -1%                   | 0.8%     | -1.0    | -1%                | 0.5%     | -1.0    |
| Taiwan Aborigine                                               | 12 | 1%             | 0.7%     | 1.7     | 1%             | 0.7%     | 1.1     | 0%                    | 0.8%     | 0.2     | 0%                 | 0.6%     | 0.7     |
| Malaysian                                                      | 10 | -1%            | 0.8%     | -0.9    | -1%            | 0.8%     | -1.0    | -1%                   | 1.0%     | -1.5    | -1%                | 0.7%     | -2.1    |
| Borneo                                                         | 49 | 1%             | 0.5%     | 1.4     | 1%             | 0.5%     | 1.1     | 0%                    | 0.6%     | 0.5     |                    |          |         |
| CHB (Chinese in Beijing)                                       | 88 |                |          |         |                |          |         |                       |          |         | -1%                | 0.5%     | -1.4    |
| CHD (Chinese in Denver)                                        | 86 | 0%             | 0.2%     | 1.7     | 0%             | 0.3%     | 1.1     | 0%                    | 0.3%     | 0.8     | 0%                 | 0.5%     | -0.7    |
| JPT (Japanese in Tokyo)                                        | 87 | 1%             | 0.3%     | 2.0     | 1%             | 0.4%     | 2.9     | 1%                    | 0.4%     | 2.1     | 0%                 | 0.6%     | -0.1    |
| <b><math>p_A(X)</math> estimate of Australian admixture</b>    |    |                |          |         |                |          |         |                       |          |         |                    |          |         |
| Fiji                                                           | 25 | 78%            | 0.9%     | 82.5    | 78%            | 1.0%     | 79.1    | 80%                   | 1.2%     | 66.3    | 77%                | 0.9%     | 81.7    |
| Philippine Mamanwa (Negrito)                                   | 11 | 13%            | 1.0%     | 13.0    | 12%            | 1.1%     | 11.4    | 9%                    | 1.2%     | 7.1     | 12%                | 1.0%     | 11.8    |
| Nusa Tenggara                                                  | 10 | 55%            | 0.9%     | 59.0    | 55%            | 1.0%     | 57.4    | 56%                   | 1.2%     | 48.6    | 54%                | 0.9%     | 58.7    |
| Moluccas                                                       | 10 | 51%            | 1.0%     | 51.7    | 51%            | 1.0%     | 49.0    | 51%                   | 1.2%     | 43.5    | 50%                | 1.0%     | 50.9    |
| Polynesia                                                      | 19 | 37%            | 0.9%     | 41.3    | 37%            | 1.0%     | 38.4    | 38%                   | 1.1%     | 33.6    | 36%                | 0.9%     | 41.4    |
| Philippine Manobo                                              | 16 | 5%             | 0.6%     | 8.7     | 5%             | 0.7%     | 8.1     | 4%                    | 0.8%     | 5.2     | 4%                 | 0.6%     | 7.0     |
| Andamanese Onge (Negrito)                                      | 10 | 3%             | 1.5%     | 2.0     | 0%             | 1.6%     | 0.1     | 1%                    | 1.8%     | 0.7     | 2%                 | 1.4%     | 1.1     |
| Malaysian Jehai (Negrito)                                      | 8  | 1%             | 1.1%     | 1.0     | 1%             | 1.1%     | 1.2     | 0%                    | 1.3%     | -0.1    | 0%                 | 1.0%     | -0.3    |
| Sumatra                                                        | 17 | 1%             | 0.6%     | 2.0     | 1%             | 0.6%     | 1.4     | 0%                    | 0.8%     | 0.5     | 0%                 | 0.5%     | -0.2    |
| Taiwan Aborigine                                               | 12 | 1%             | 0.7%     | 2.0     | 1%             | 0.7%     | 1.4     | 0%                    | 0.8%     | 0.4     | 0%                 | 0.7%     | 0.0     |
| Malaysian                                                      | 10 | 0%             | 0.8%     | -0.1    | 0%             | 0.8%     | -0.2    | -1%                   | 1.0%     | -0.8    | -1%                | 0.7%     | -2.2    |
| Borneo                                                         | 49 | 1%             | 0.5%     | 2.6     | 1%             | 0.5%     | 2.3     | 1%                    | 0.6%     | 1.5     |                    |          |         |
| CHB (Chinese in Beijing)                                       | 88 |                |          |         |                |          |         |                       |          |         | -1%                | 0.5%     | -2.5    |
| CHD (Chinese in Denver)                                        | 86 | 1%             | 0.2%     | 2.5     | 1%             | 0.3%     | 2.0     | 0%                    | 0.3%     | 1.6     | -1%                | 0.5%     | -1.5    |
| JPT (Japanese in Tokyo)                                        | 87 | 0%             | 0.3%     | 1.3     | 1%             | 0.4%     | 2.2     | 1%                    | 0.4%     | 1.5     | -1%                | 0.6%     | -1.5    |

Note: This table shows estimates of the Near Oceanian  $p_N(X)$  and Australian ancestry  $p_A(X)$  for a variety of outgroup populations. We find that similar results are obtained for diverse choices of reference populations  $A$  and  $E$ .
